# Supplementary material for: High-throughput analysis of spatio-temporal dynamics in Dictyostelium
Source: PubMed Central journal article supplement (PMC2323234; doi:10.1186/gb-2007-8-7-r144), 2007-07-21

# Supplementary Figure

S. Sawai et al (2007) "High-Throughput Analysis of Spatio-temporal Dynamics in Dictyostelium"

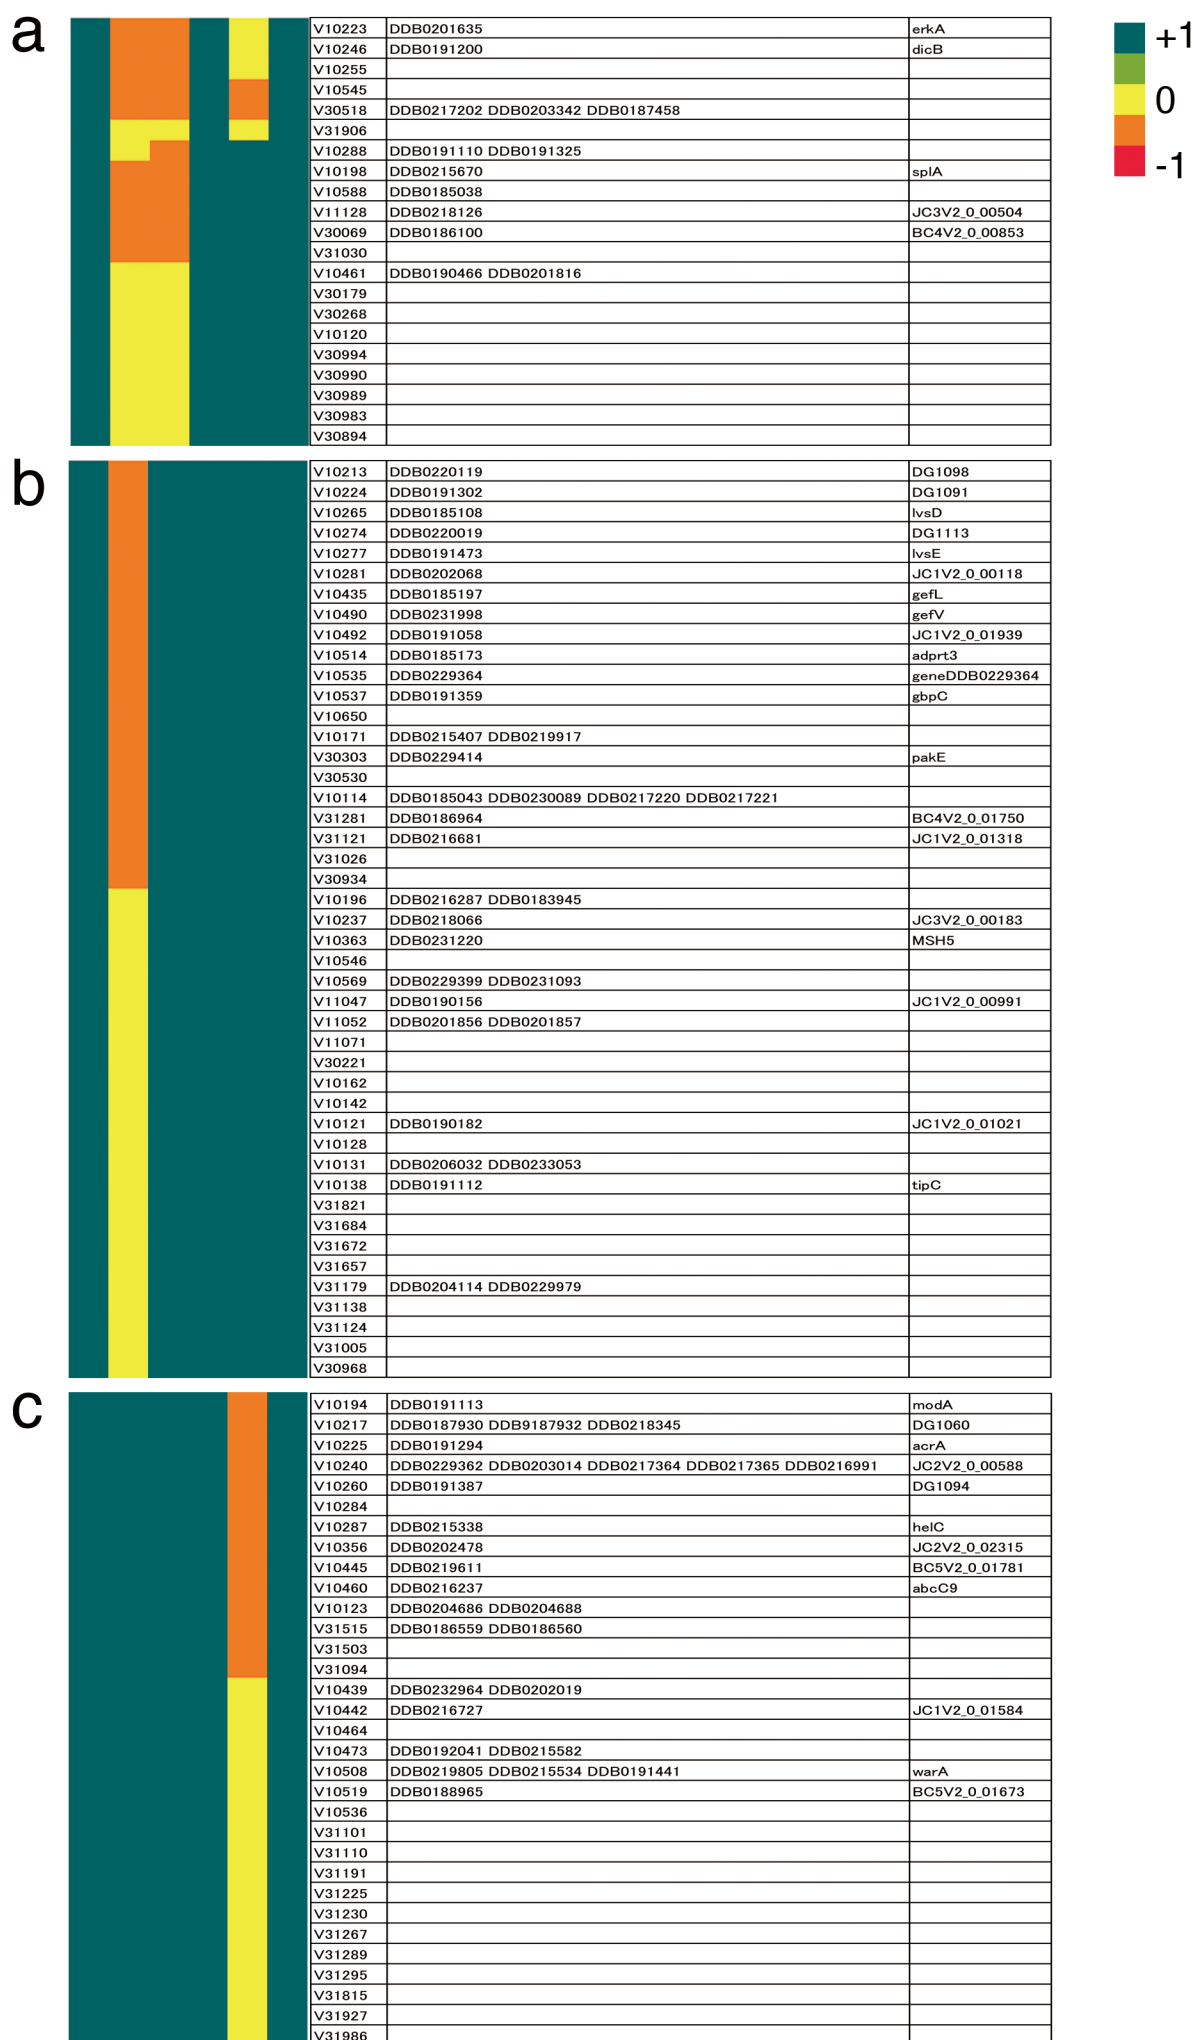

Supplement: gb-2007-8-7-r144-S4.pdf [file gb-2007-8-7-r144-S4.pdf]
